# Supplementary material for: Patterns of Sequelae in Women with a History of Localized Breast Cancer: Results from the French VICAN Survey
Source: MDPI journal article supplement (doi:10.3390/cancers13051161), 2021-03-08
Supplement: s1 [file s1]

### Supplementary data

**Table S1:** Description of the key words and expressions used by the BC women from the VICAN study (n=654) to recode the variables into 21 sequelae.

| Sequelae      | Keywords/expressions                                                                                                                                                                                                                                                                                                                                                                                                                                                     |
|---------------|--------------------------------------------------------------------------------------------------------------------------------------------------------------------------------------------------------------------------------------------------------------------------------------------------------------------------------------------------------------------------------------------------------------------------------------------------------------------------|
| Functioning   |                                                                                                                                                                                                                                                                                                                                                                                                                                                                          |
| Arm           | Loss of hand sensitivity<br>Numbness in the hands<br>Arm disability<br>Difficulty in raising the arm<br>Difficulty carrying things<br>Loss of strength in the arm<br>Stiffness in the arm<br>Hand swelling<br>Oedema<br>Reduced amplitudes                                                                                                                                                                                                                               |
| Other         | Difficulty to move<br>Back problem<br>Muscular pain<br>Breast sensitivity<br>Impossible to bend down<br>Difficulty in making an effort<br>Shivers all the time<br>Head spinning<br>Recovery time<br>Disability<br>Overall loss of strength/legs<br>I can no longer carry any weight<br>Difficult to walk<br>Without medication I can no longer walk<br>Loss of motricity<br>Heavy members<br>Loss of energy<br>I can no longer do the same physical activities as before |
| Pain          | Pain<br>Excruciating tingling<br>Stab<br>Suffering<br>Sensitivity<br>All the time bad                                                                                                                                                                                                                                                                                                                                                                                    |
| Esthetic      | Scar<br>Difference in breast volume/asymmetry<br>Hair that doesn't grow back like it used to<br>Breast deformity<br>I can't look at myself in the mirror<br>Skin colour problem (discolouration or darker skin)<br>Loss of breast(s)<br>Loss of nails<br>Hair that is different<br>Depigmentation<br>Eyebrows that no longer grow back<br>Mutilation                                                                                                                     |
| Psychological | Psychologically it's difficult<br>Too much stress                                                                                                                                                                                                                                                                                                                                                                                                                        |

|               |                                                                                                                                                                                                                                                                                                                                                                                                                                                                                                                                                                                                                           |
|---------------|---------------------------------------------------------------------------------------------------------------------------------------------------------------------------------------------------------------------------------------------------------------------------------------------------------------------------------------------------------------------------------------------------------------------------------------------------------------------------------------------------------------------------------------------------------------------------------------------------------------------------|
|               | <p> Fear of relapse<br/> Fear of dying<br/> Worried about the future<br/> Suicidal thoughts<br/> Low morale<br/> Declining confidence<br/> I can't look at myself in the mirror<br/> Difficulty in accepting the situation<br/> Anxiety<br/> Psychological sequelae<br/> Difficult to live with<br/> They don't spare me<br/> Phantom breast<br/> We think about illness every day<br/> I feel abandoned<br/> I often cry<br/> Different life<br/> Depression<br/> I see things negatively<br/> I can't forget what happened<br/> Upheaval in life<br/> No longer be like the others<br/> Mutilation<br/> Loneliness </p> |
| Gynecological | <p> Hot flush<br/> Vaginal dryness<br/> Burning sensations<br/> Excessive perspiration<br/> Gynecological problems </p>                                                                                                                                                                                                                                                                                                                                                                                                                                                                                                   |
| Fatigue       | <p> Fatigue<br/> I need to rest often<br/> I take naps<br/> Lack of sleep </p>                                                                                                                                                                                                                                                                                                                                                                                                                                                                                                                                            |
| Cognitive     | <p> Concentration problem<br/> Memory problem<br/> Neurological trouble<br/> I'm losing my mind </p>                                                                                                                                                                                                                                                                                                                                                                                                                                                                                                                      |
| Weight        | <p> Put on weight<br/> I have to pay attention to my figure </p>                                                                                                                                                                                                                                                                                                                                                                                                                                                                                                                                                          |
| Urinary       | <p> Urinary infections </p>                                                                                                                                                                                                                                                                                                                                                                                                                                                                                                                                                                                               |
| Skin          | <p> Skin reaction<br/> Skin thickening<br/> Skin burn<br/> Dry skin </p>                                                                                                                                                                                                                                                                                                                                                                                                                                                                                                                                                  |
| Vision        | <p> Vision problem<br/> Loss of eyesight </p>                                                                                                                                                                                                                                                                                                                                                                                                                                                                                                                                                                             |
| Digestive     | <p> Digestion trouble<br/> Bowel problems </p>                                                                                                                                                                                                                                                                                                                                                                                                                                                                                                                                                                            |
| Respiratory   | <p> Shortness of breath<br/> Loss of breath </p>                                                                                                                                                                                                                                                                                                                                                                                                                                                                                                                                                                          |
| Sleep         | <p> Insomnia<br/> I can no longer sleep<br/> Fractioned sleep </p>                                                                                                                                                                                                                                                                                                                                                                                                                                                                                                                                                        |
| Sexual        | <p> Difficult married life (sexually speaking) </p>                                                                                                                                                                                                                                                                                                                                                                                                                                                                                                                                                                       |

|           |                                                                                                                                                 |
|-----------|-------------------------------------------------------------------------------------------------------------------------------------------------|
|           | Pain during sexual intercourse<br>Loss of libido<br>Difficult to have sex with one less breast<br>Can no longer have children<br>Sexual problem |
| Cardiac   | Cardiac complications                                                                                                                           |
| Hearing   | Inner ear problem<br>I can no longer hear very well                                                                                             |
| Financial | I spend a lot of money on my care<br>I can no longer work                                                                                       |
| Dental    |                                                                                                                                                 |
| Other     | Sense of smell<br>Taste problems<br>Burn in the mouth<br>Gustative trouble<br>Thyroid disturbance                                               |
